# Supplementary material for: Towards green chemicals and edible coatings from barks and peels with near critical extraction of suberin
Source: Royal Society of Chemistry journal article supplement (doi:10.1039/d3gc02552g), 2023-01-01
Supplement: d3gc02552g16.pdf [file d3gc02552g16.pdf]

| T - P - Dur. - PSS |     |             |    |     | Suberinic Extract (%)    | Glycerol (‰)               | COOH/Glycerol molar ratio |
|--------------------|-----|-------------|----|-----|--------------------------|----------------------------|---------------------------|
| <b>1</b>           | 418 | [<7.0]      | 0  | L   | 0.0 ± 0.0 <sup>a</sup>   | 0 ± 0 <sup>a</sup>         | -                         |
| <b>2</b>           | 473 | [7.0-8.0]   | 0  | L   | 5.0 ± 0.1 <sup>b</sup>   | 0 ± 0.01 <sup>ab</sup>     | 5501 ± 2009 <sup>d</sup>  |
| <b>3</b>           | 493 | [8.1-10.0]  | 0  | CL  | 7.2 ± 0.5 <sup>cd</sup>  | 0.05 ± 0.01 <sup>ac</sup>  | 2755 ± 584 <sup>c</sup>   |
| <b>4</b>           | 493 | [>14.5]     | 0  | CL  | 7.6 ± 0.5 <sup>cd</sup>  | 0.06 ± 0 <sup>ac</sup>     | 1601 ± 1003 <sup>b</sup>  |
| <b>5</b>           | 493 | [8.1-10.0]  | 60 | CL  | 10.0 ± 0.1 <sup>fg</sup> | 0.24 ± 0.04 <sup>cd</sup>  | 817 ± 129 <sup>ab</sup>   |
| <b>6</b>           | 493 | [>14.5]     | 60 | CL  | 10.4 ± 0.3 <sup>fg</sup> | 0.2 ± 0.02 <sup>cd</sup>   | 640 ± 377 <sup>ab</sup>   |
| <b>7</b>           | 518 | [7.0-8.0]   | 0  | G   | 5.4 ± 0.1 <sup>bc</sup>  | 0.17 ± 0.03 <sup>ad</sup>  | 1037 ± 220 <sup>ab</sup>  |
| <b>8</b>           | 518 | [8.1-10.0]  | 0  | SCF | 9.1 ± 0.3 <sup>df</sup>  | 0.13 ± 0.02 <sup>bcd</sup> | 1154 ± 407 <sup>ab</sup>  |
| <b>9</b>           | 518 | [7.0-8.0]   | 60 | G   | 4.6 ± 0.2 <sup>b</sup>   | 1.07 ± 0.03 <sup>g</sup>   | 176 ± 13 <sup>a</sup>     |
| <b>10</b>          | 518 | [8.1-10.0]  | 60 | SCF | 9.8 ± 0.0 <sup>efg</sup> | 0.58 ± 0.02 <sup>f</sup>   | 262 ± 81 <sup>a</sup>     |
| <b>11</b>          | 543 | [10.1-13.4] | 0  | SCF | 7.5 ± 0.1 <sup>cde</sup> | 0.48 ± 0.02 <sup>ef</sup>  | 262 ± 110 <sup>a</sup>    |
| <b>12</b>          | 543 | [13.4-14.5] | 0  | SCF | 11.3 ± 0.8 <sup>g</sup>  | 0.36 ± 0.01 <sup>de</sup>  | 518 ± 84 <sup>ab</sup>    |
| <b>13</b>          | 553 | [8.1-10.0]  | 0  | SCF | 3.8 ± 0.2 <sup>b</sup>   | 0.98 ± 0.02 <sup>g</sup>   | 157 ± 55 <sup>a</sup>     |
