# Supplementary material for: Towards green chemicals and edible coatings from barks and peels with near critical extraction of suberin
Source: Royal Society of Chemistry journal article supplement (doi:10.1039/d3gc02552g), 2023-01-01
Supplement: d3gc02552g17.pdf [file d3gc02552g17.pdf]

| <b>Biomass - T° - P° - Dur. - PSS</b> | <b>Sub. ext.(%)</b> | <b>Glycerol (mg/g)</b> | <b>COOH/Gly. molar ratio</b> |
|---------------------------------------|---------------------|------------------------|------------------------------|
| E-Qr 493 [81-100] 0 CL                | $7.2 \pm 0.5^b$     | $0.05 \pm 0.01^a$      | $2755 \pm 584^b$             |
| E-Qr 518 [70-80] 60 G                 | $4.6 \pm 0.2^a$     | $1.07 \pm 0.03^b$      | $176 \pm 13^a$               |
| E-Me 493 [81-100] 0 CL                | $10.3 \pm 0.2^c$    | $0.2 \pm 0.06^a$       | $281 \pm 129^a$              |
| E-Me 518 [70-80] 60 G                 | $15.7 \pm 2.4^d$    | $1.1 \pm 0.03^b$       | $65 \pm 7^a$                 |
