# Supplementary material for: Towards green chemicals and edible coatings from barks and peels with near critical extraction of suberin
Source: Royal Society of Chemistry journal article supplement (doi:10.1039/d3gc02552g), 2023-01-01
Supplement: d3gc02552g18.pdf [file d3gc02552g18.pdf]

|                                                                          | Oak                  |                   | Cassava           | Retention index |
|--------------------------------------------------------------------------|----------------------|-------------------|-------------------|-----------------|
|                                                                          | 518K 60min<br>7.5MPa | 493K 0min<br>9MPa | 493K 0min<br>9MPa |                 |
| <b>Triacylglycerol (TAG)</b>                                             | <b>3.1</b>           | <b>11.6</b>       | <b>1.5</b>        |                 |
| Gly-1,2,3-C(8:0)*                                                        | /                    | 1.9               | /                 | 2954            |
| Gly-2-C(10:0)-1,3-C(8:0)*                                                | 1.4                  | 5.0               | 1.0               | 3135            |
| Gly-2-C(8:0)-1,3-C(10:0)*                                                | 1.7                  | 4.6               | 0.4               | 3542            |
| <b>Monoacylglycerol (MAG)</b>                                            | <b>3.7</b>           | <b>0.6</b>        | <b>52.0</b>       |                 |
| Gly-2-C(16:0)-1,3-diOH*                                                  | /                    | /                 | 1.2               | 2570            |
| Gly-2,3-diOH-1-C(16:0)*                                                  | 1.3                  | 0.6               | 31.9              | 2606            |
| Gly-2-C(18:0)-1,3-diOH*                                                  | Trace                | Trace             | Trace             | 2765            |
| Gly-2,3-diOH-1-C(18:0)*                                                  | 2.4                  | Trace             | 18.9              | 2802            |
| <b><math>\alpha</math>, <math>\omega</math>-dicarboxylic acids (DCA)</b> | <b>1.1</b>           | <b>Trace</b>      | <b>Trace</b>      |                 |
| 9,10-epoxy-C(18:0)**                                                     | 1.1                  | Trace             | Trace             | 2765            |
| <b><math>\omega</math>-Hydroxyfatty acids (HFA)</b>                      | <b>12.5</b>          | <b>Trace</b>      | <b>4.7</b>        |                 |
| 12,18-OH-C(18:1)**                                                       | /                    | /                 | 4.7               | 2228            |
| 18-OH-C(18:1)*                                                           | 12.5                 | /                 | /                 | 2228            |
| 18-OH-9,10-diOH-C(18:0)*                                                 | Trace                | Trace             | Trace             | 2782            |
| <b>Fatty Acids (FA)</b>                                                  | <b>25.9</b>          | <b>20.1</b>       | <b>10.9</b>       |                 |
| C(16:0)*                                                                 | 9.4                  | 4.9               | 4.6               | 2054            |
| C(18:0)*                                                                 | 8.8                  | 4.0               | 4.0               | 2253            |
| C(19:0)*                                                                 | 7.7                  | 11.2              | 2.4               | 2347            |
