# Supplementary figures and images for: Towards green chemicals and edible coatings from barks and peels with near critical extraction of suberin
Source: Royal Society of Chemistry journal article supplement (doi:10.1039/d3gc02552g), 2023-01-01

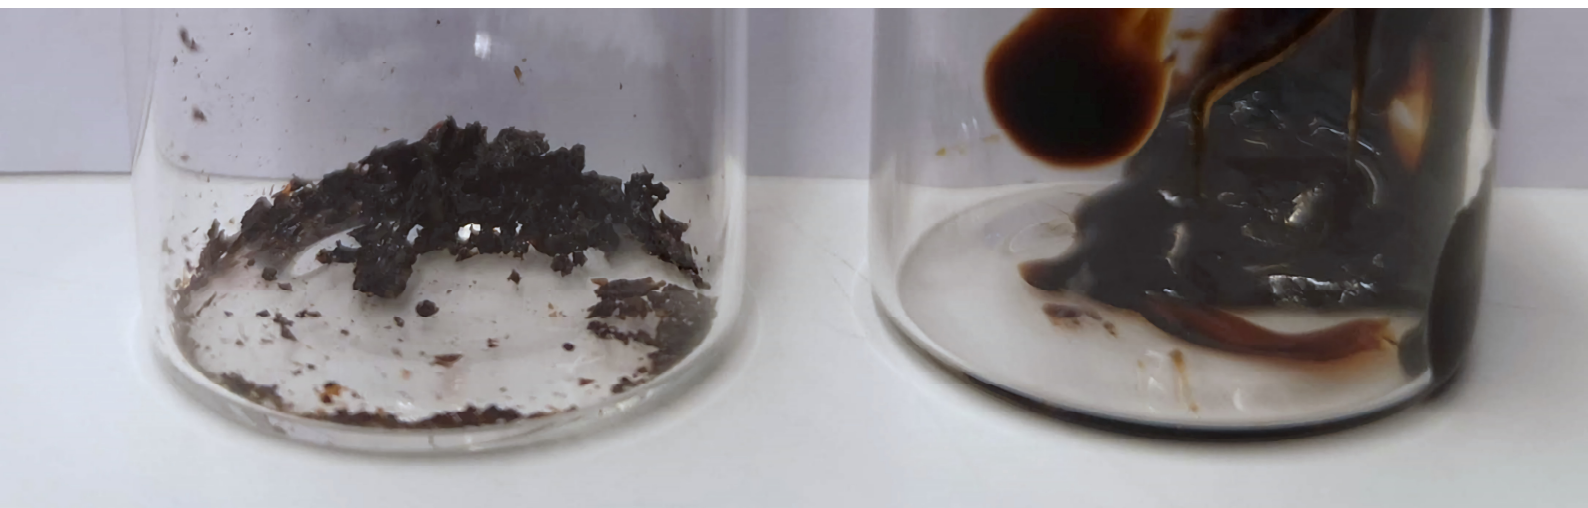

Supplement: d3gc02552g10.pdf [file d3gc02552g10.pdf]

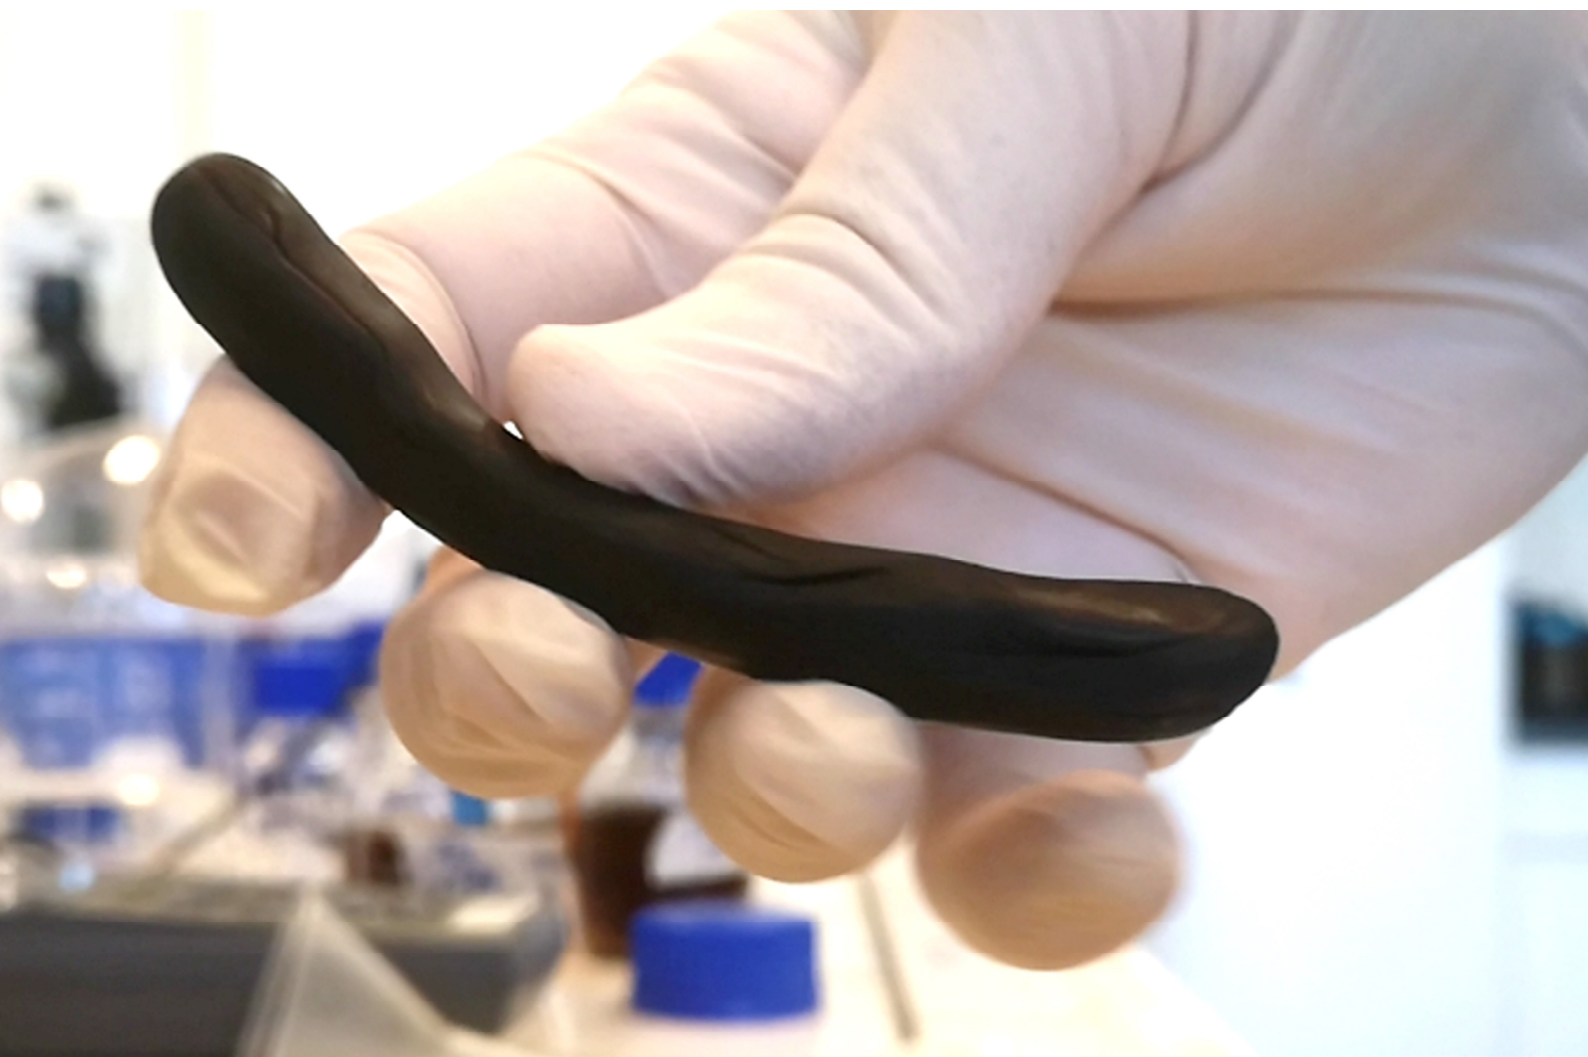

Supplement: d3gc02552g11.pdf [file d3gc02552g11.pdf]

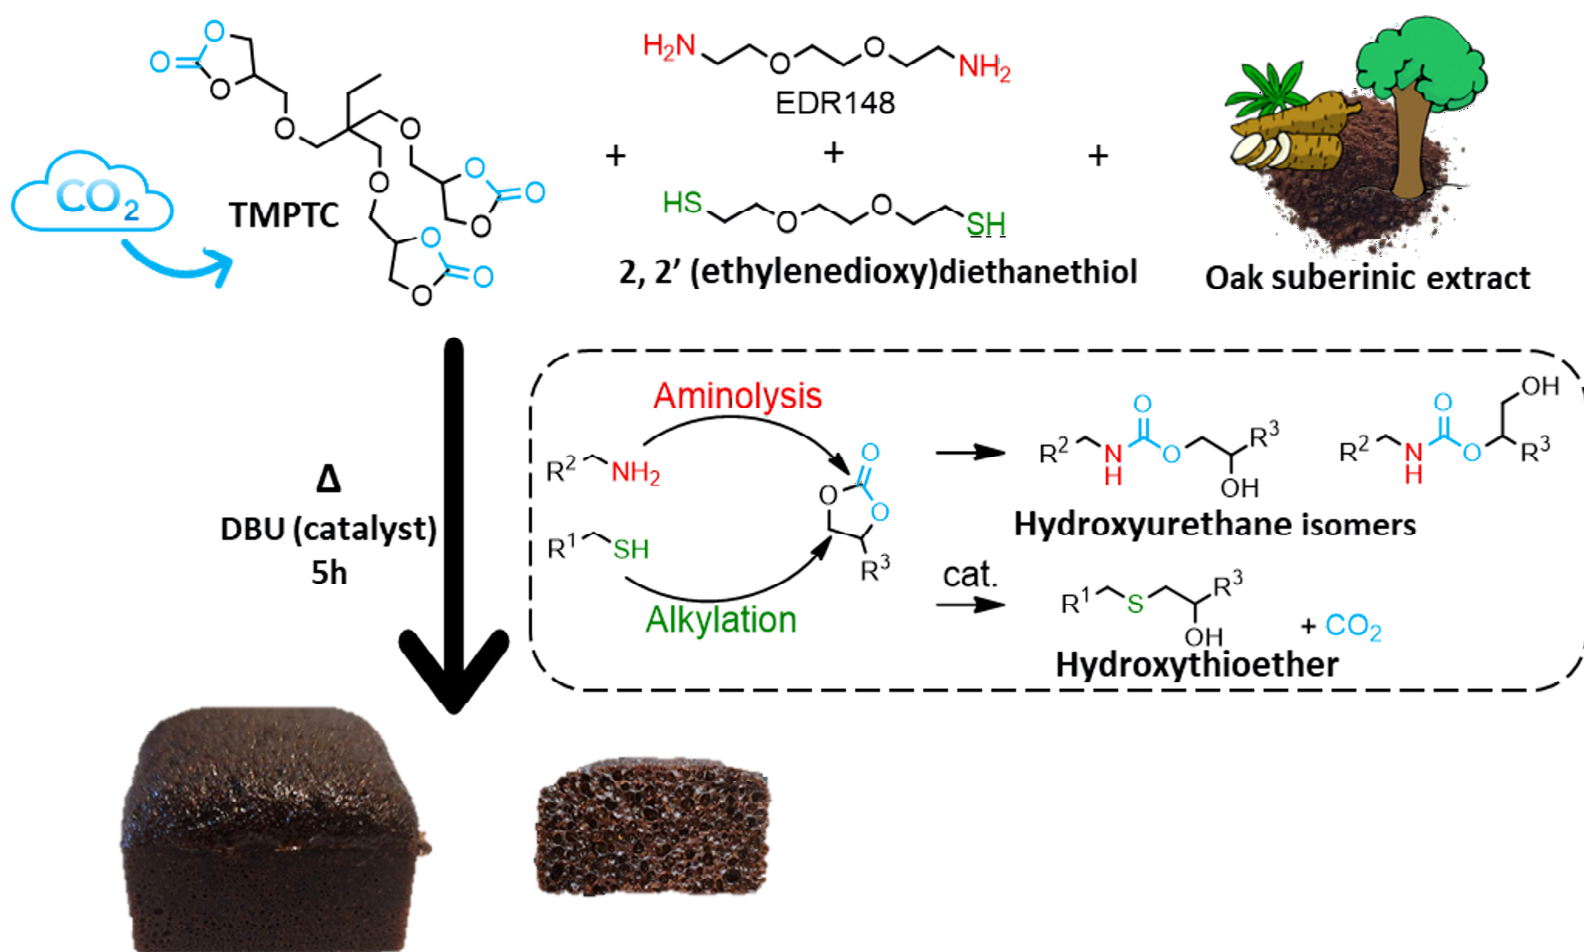

Supplement: d3gc02552g12.pdf [file d3gc02552g12.pdf]

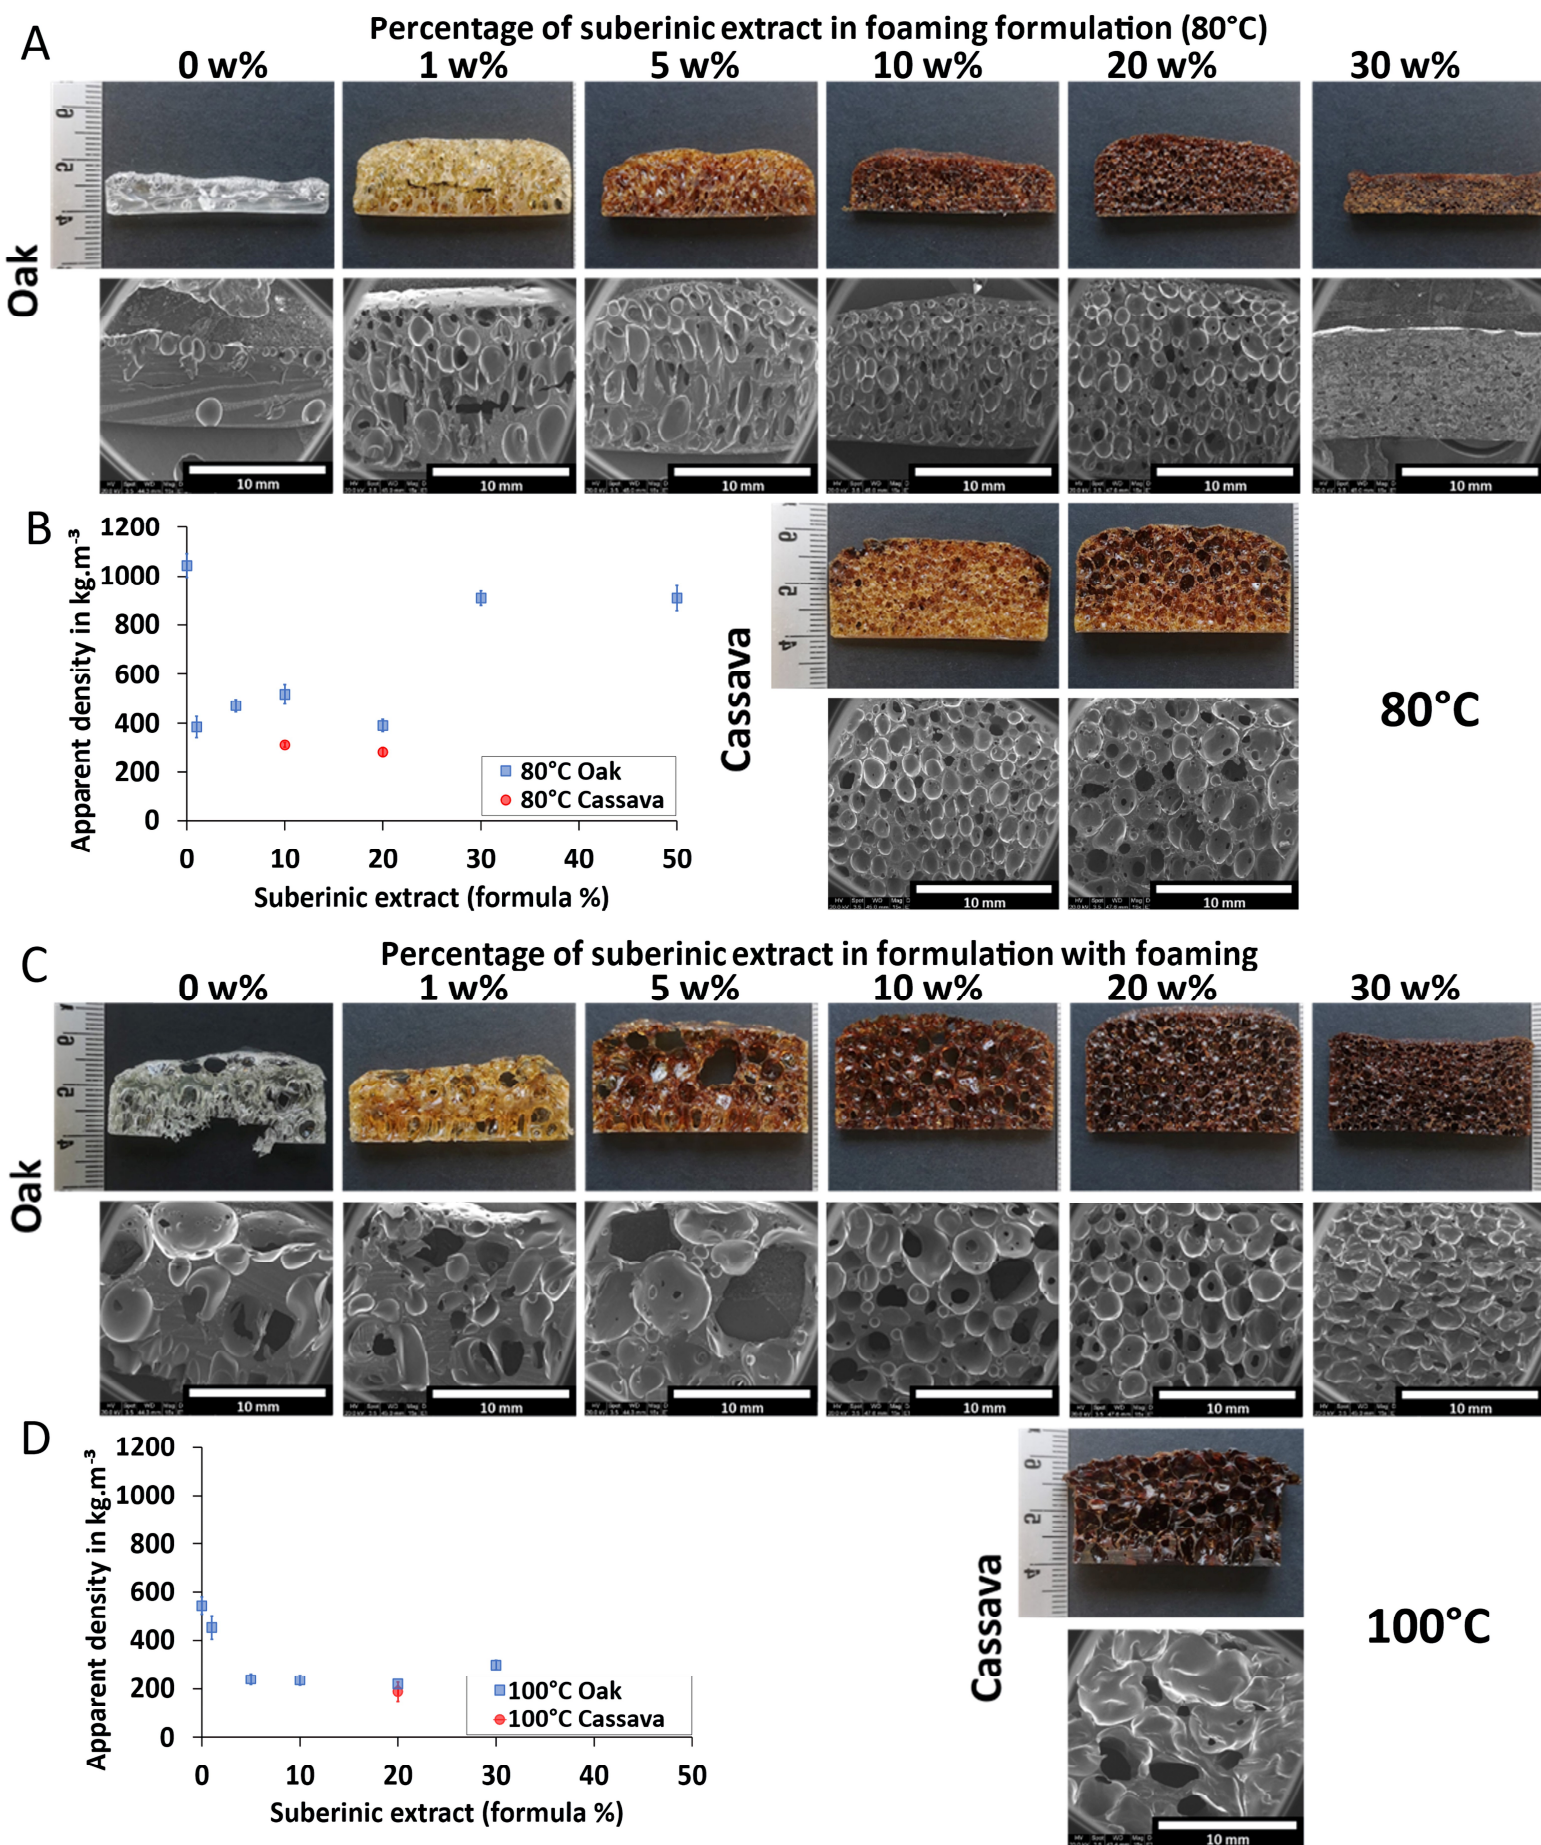

Supplement: d3gc02552g13.pdf [file d3gc02552g13.pdf]

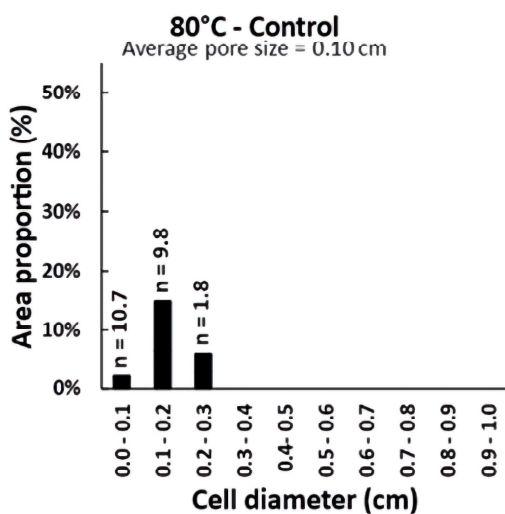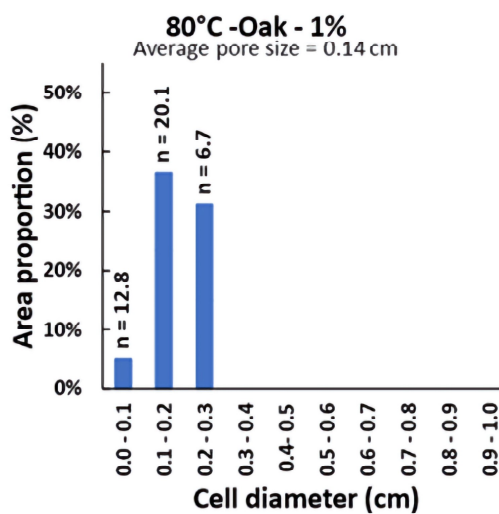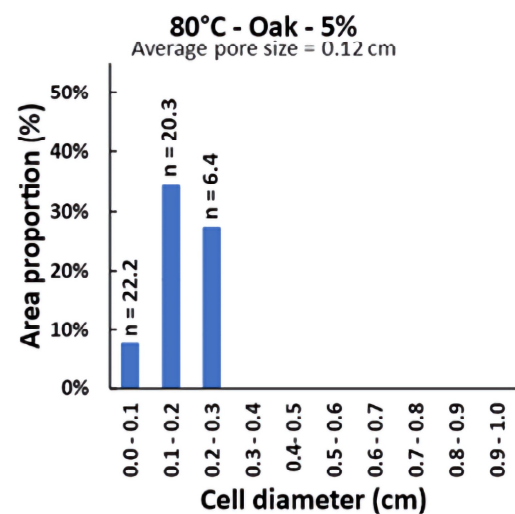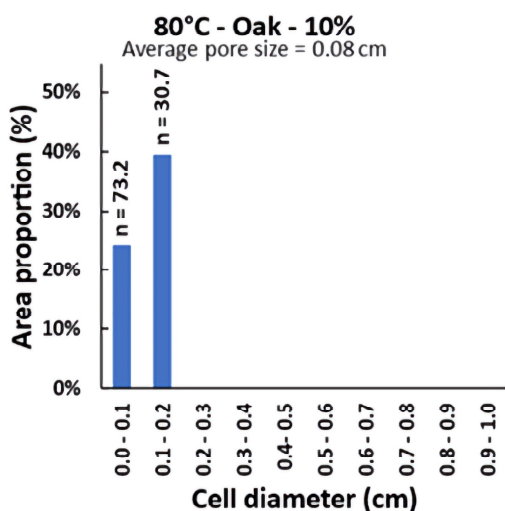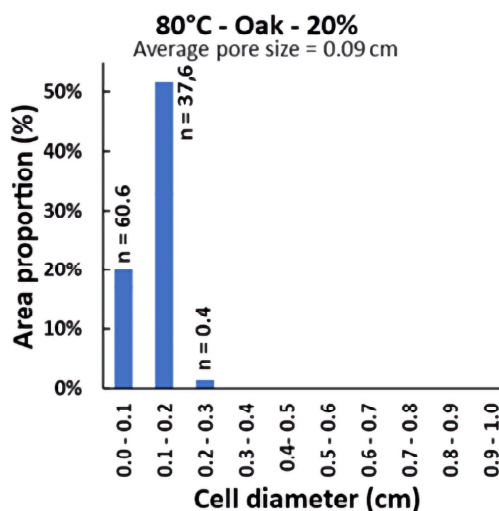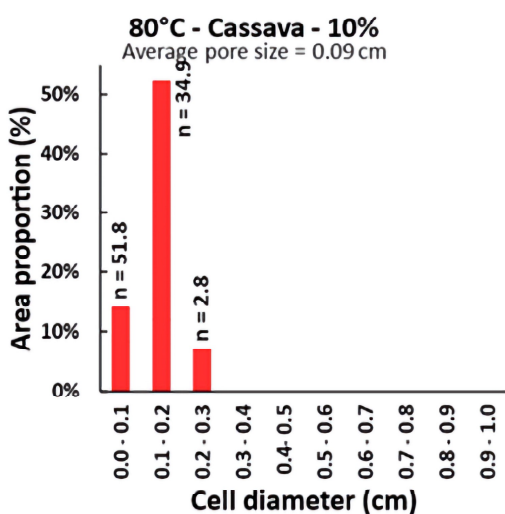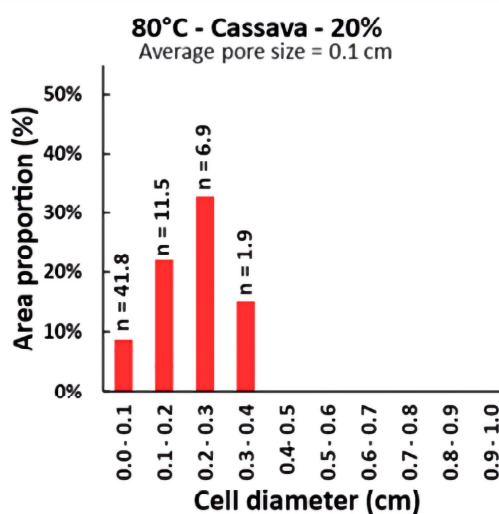

Supplement: d3gc02552g14.pdf [file d3gc02552g14.pdf]

# Polyaromatics

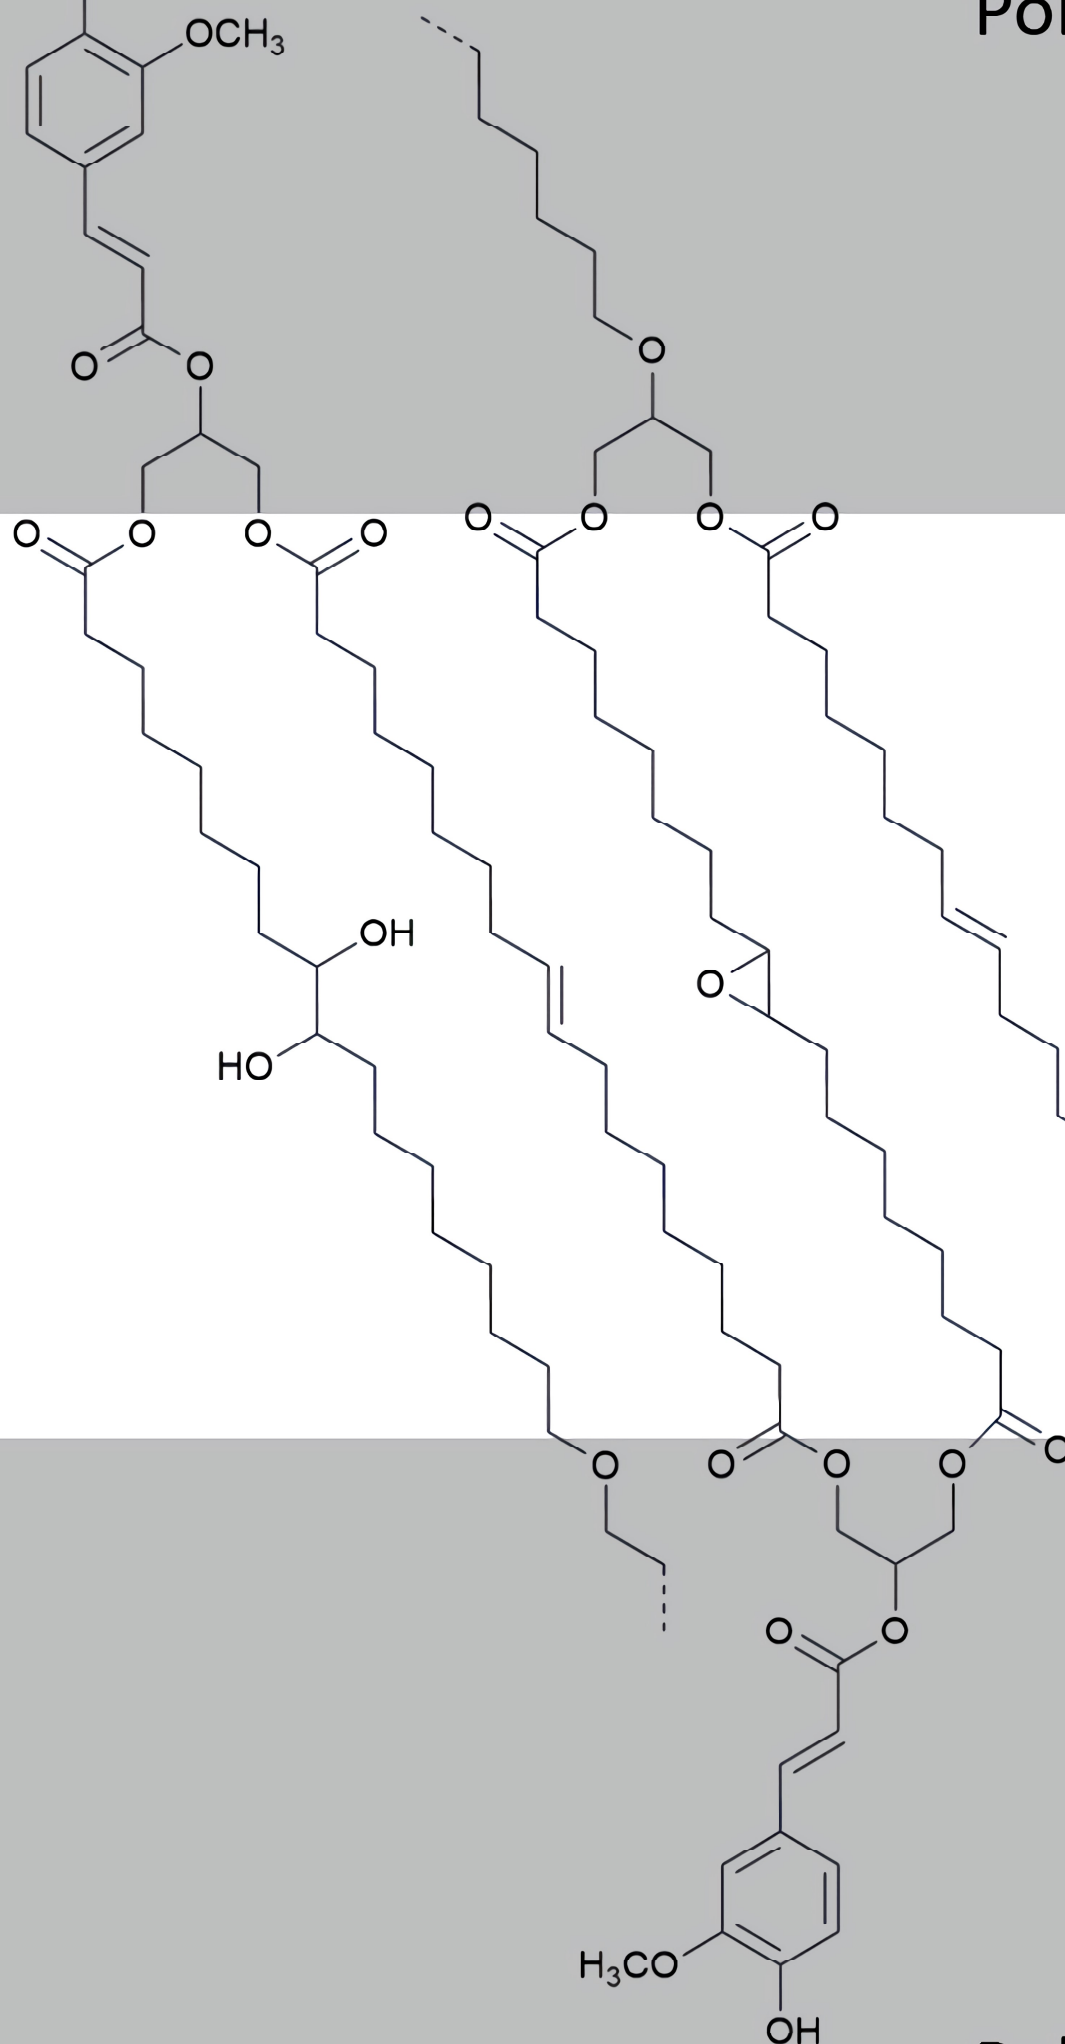

# Suberatin

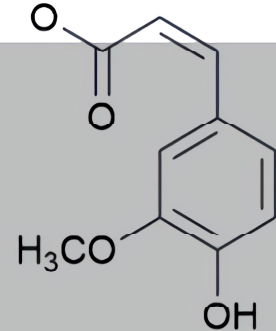

# Polyaromatics

Supplement: d3gc02552g2.pdf [file d3gc02552g2.pdf]

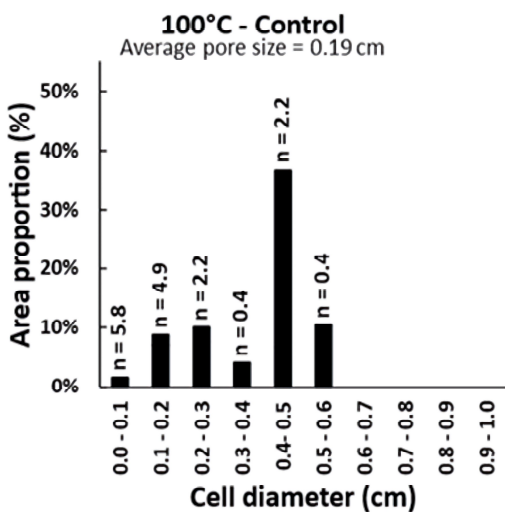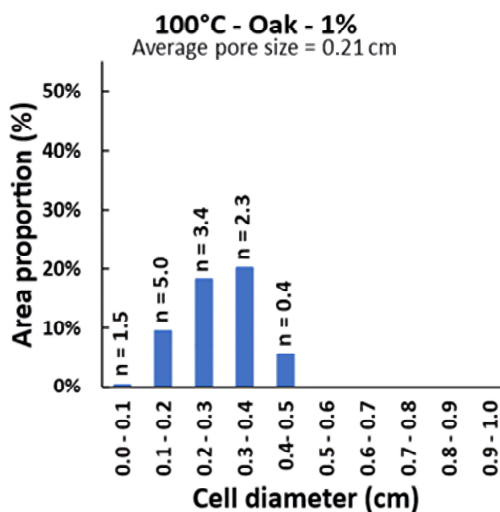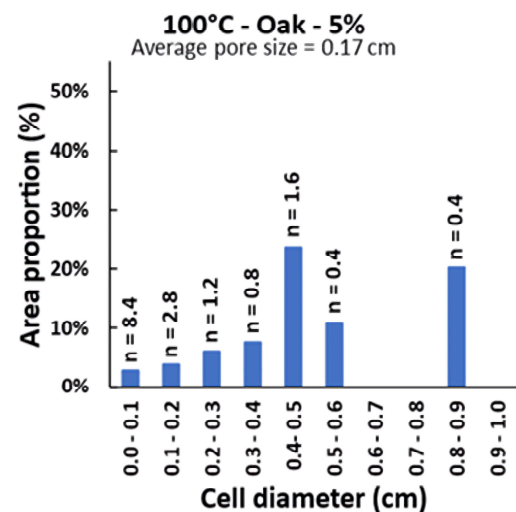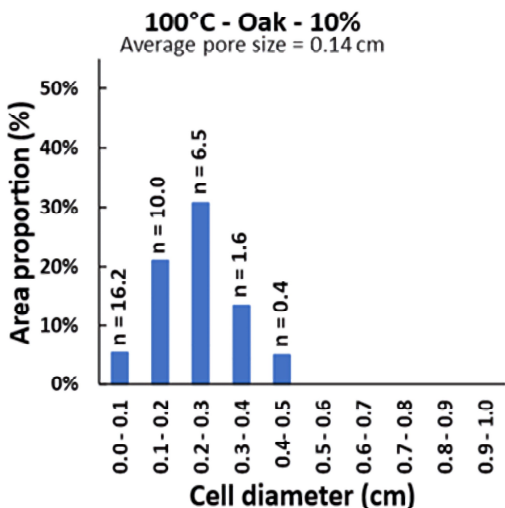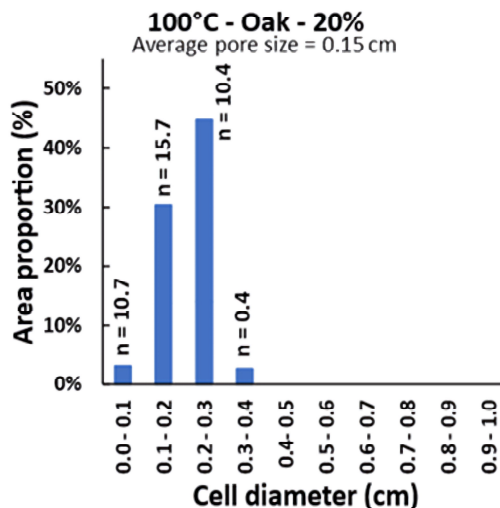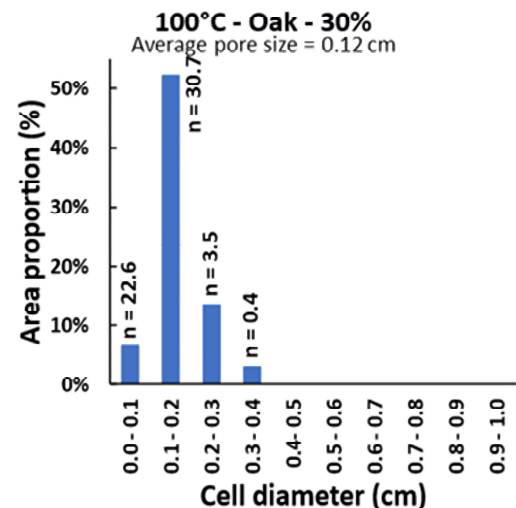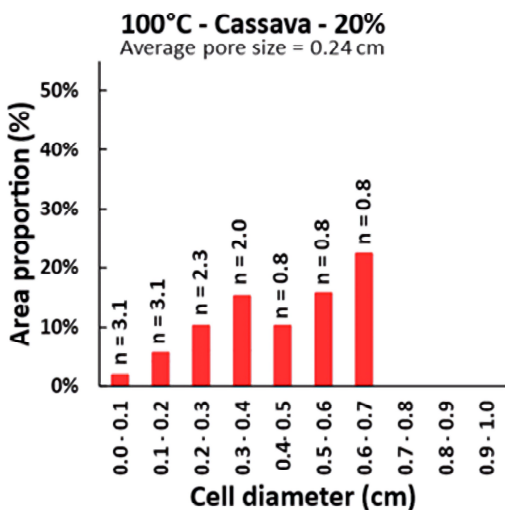

Supplement: d3gc02552g3.pdf [file d3gc02552g3.pdf]

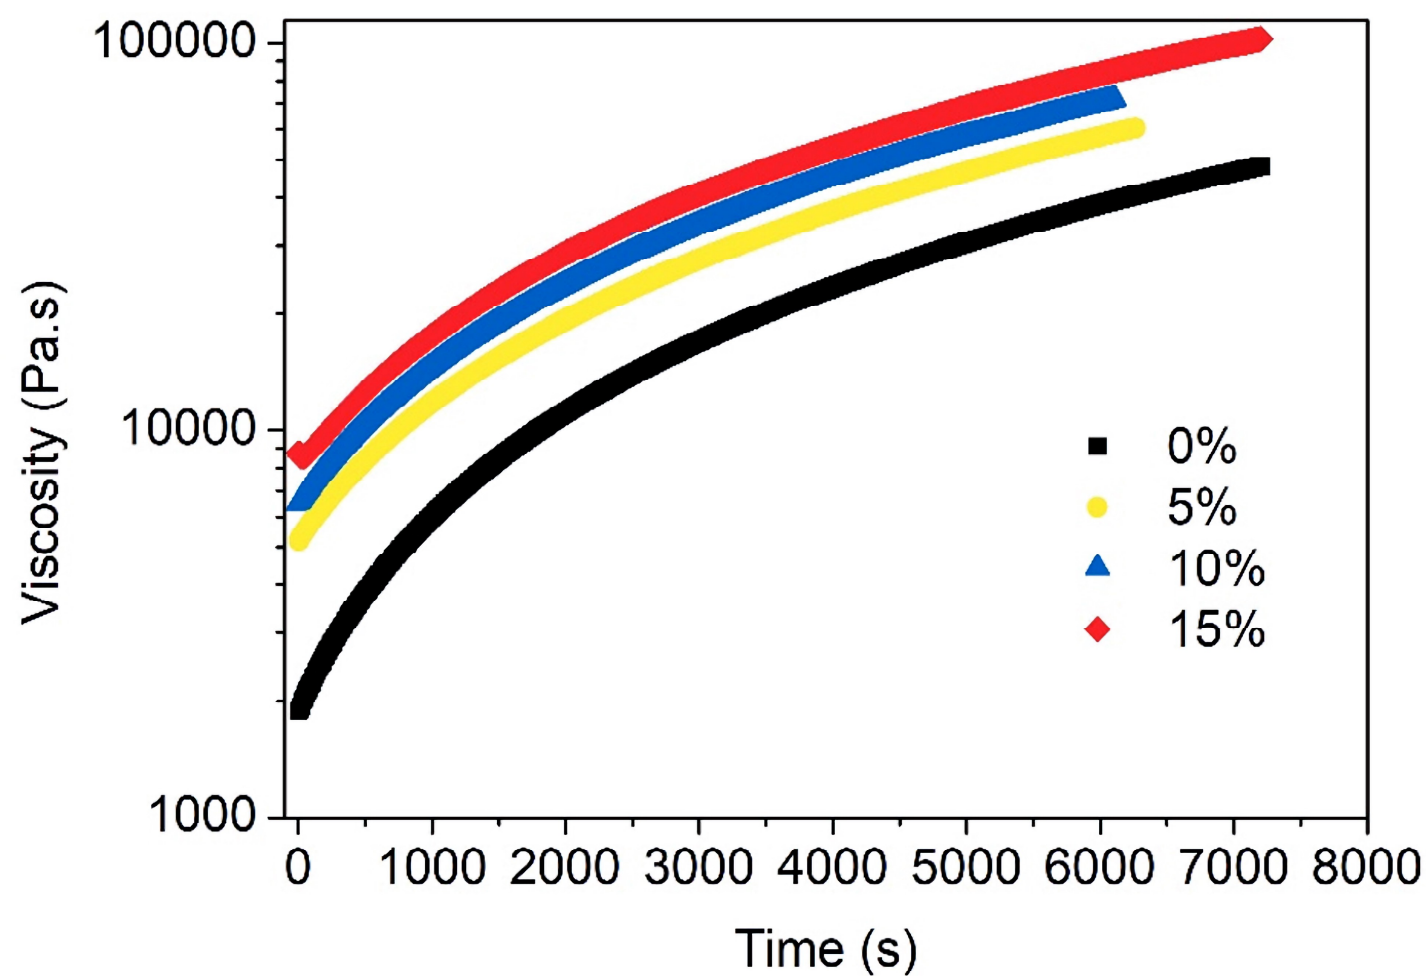

Supplement: d3gc02552g4.pdf [file d3gc02552g4.pdf]

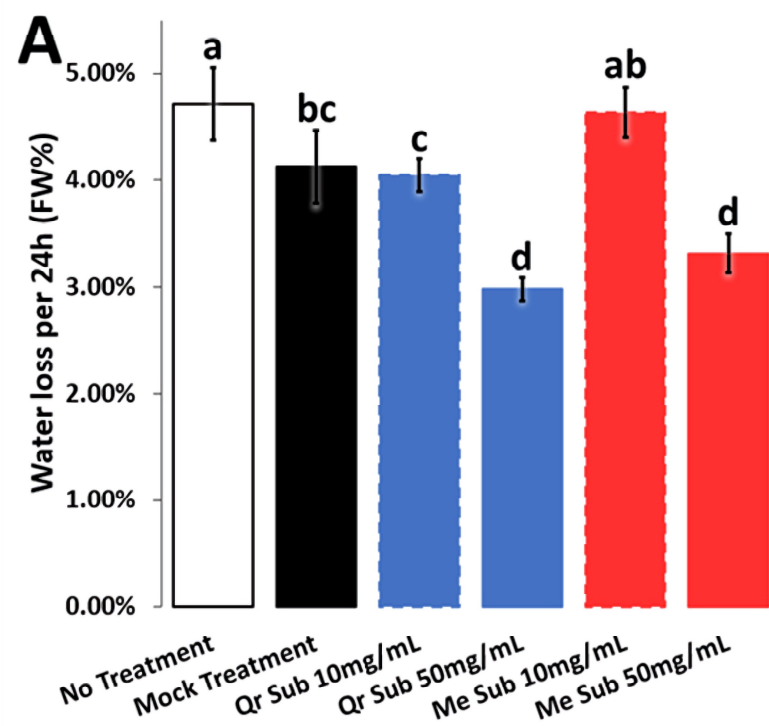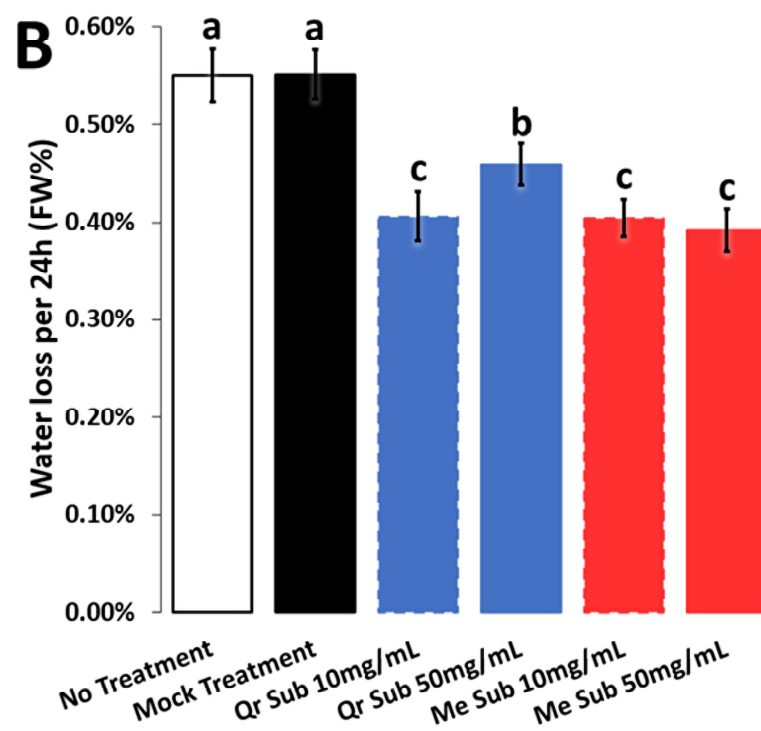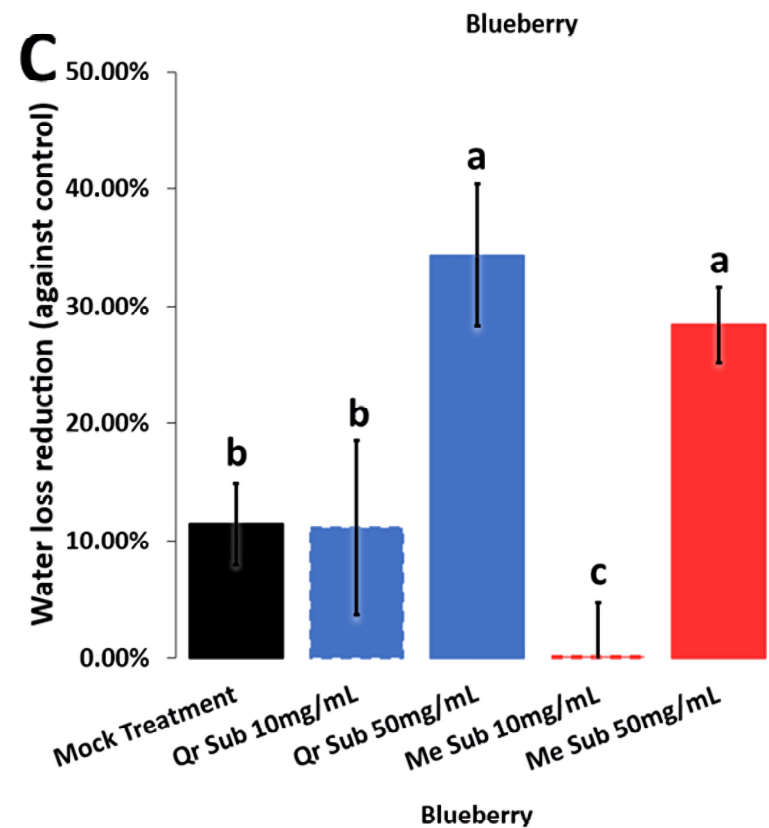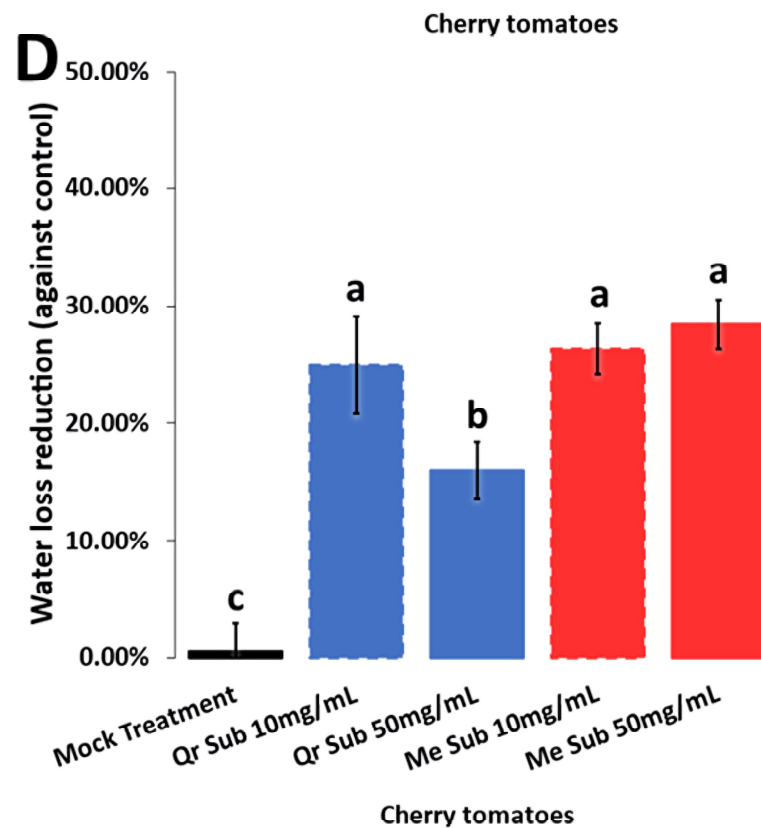

Supplement: d3gc02552g5.pdf [file d3gc02552g5.pdf]

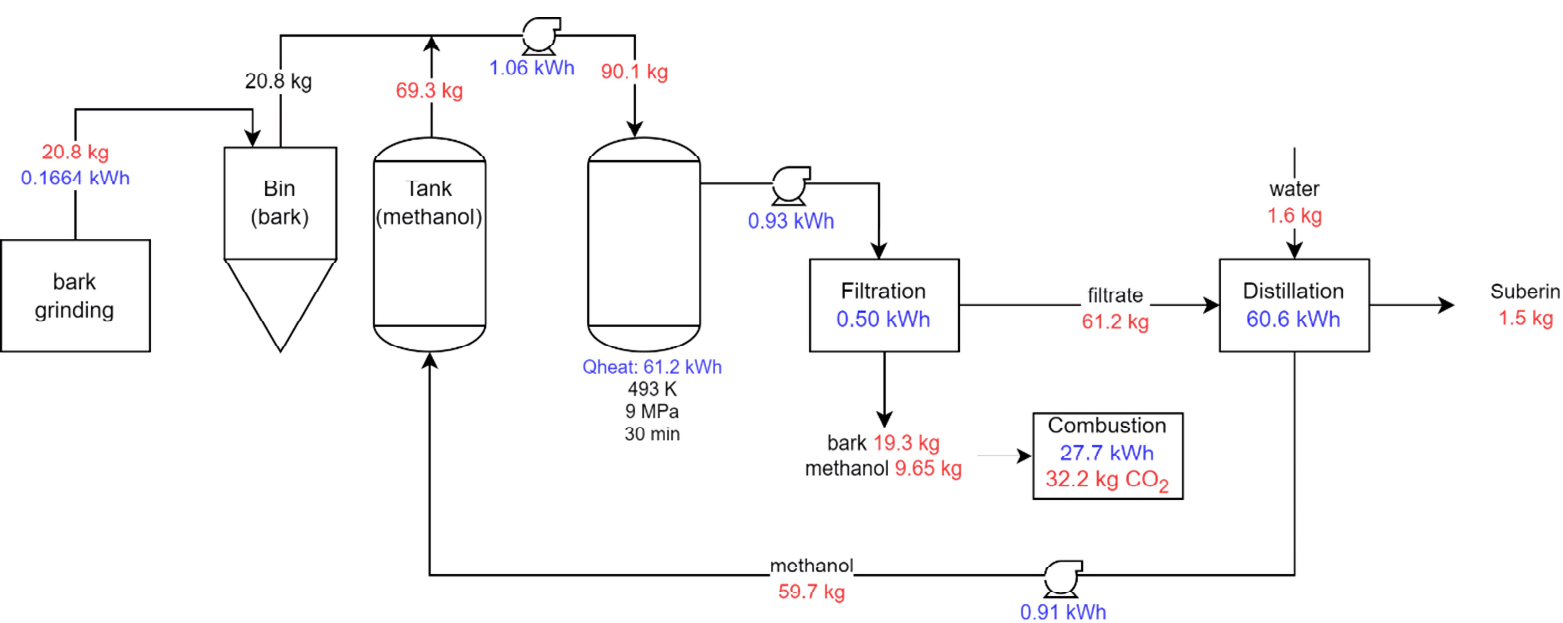

Supplement: d3gc02552g6.pdf [file d3gc02552g6.pdf]

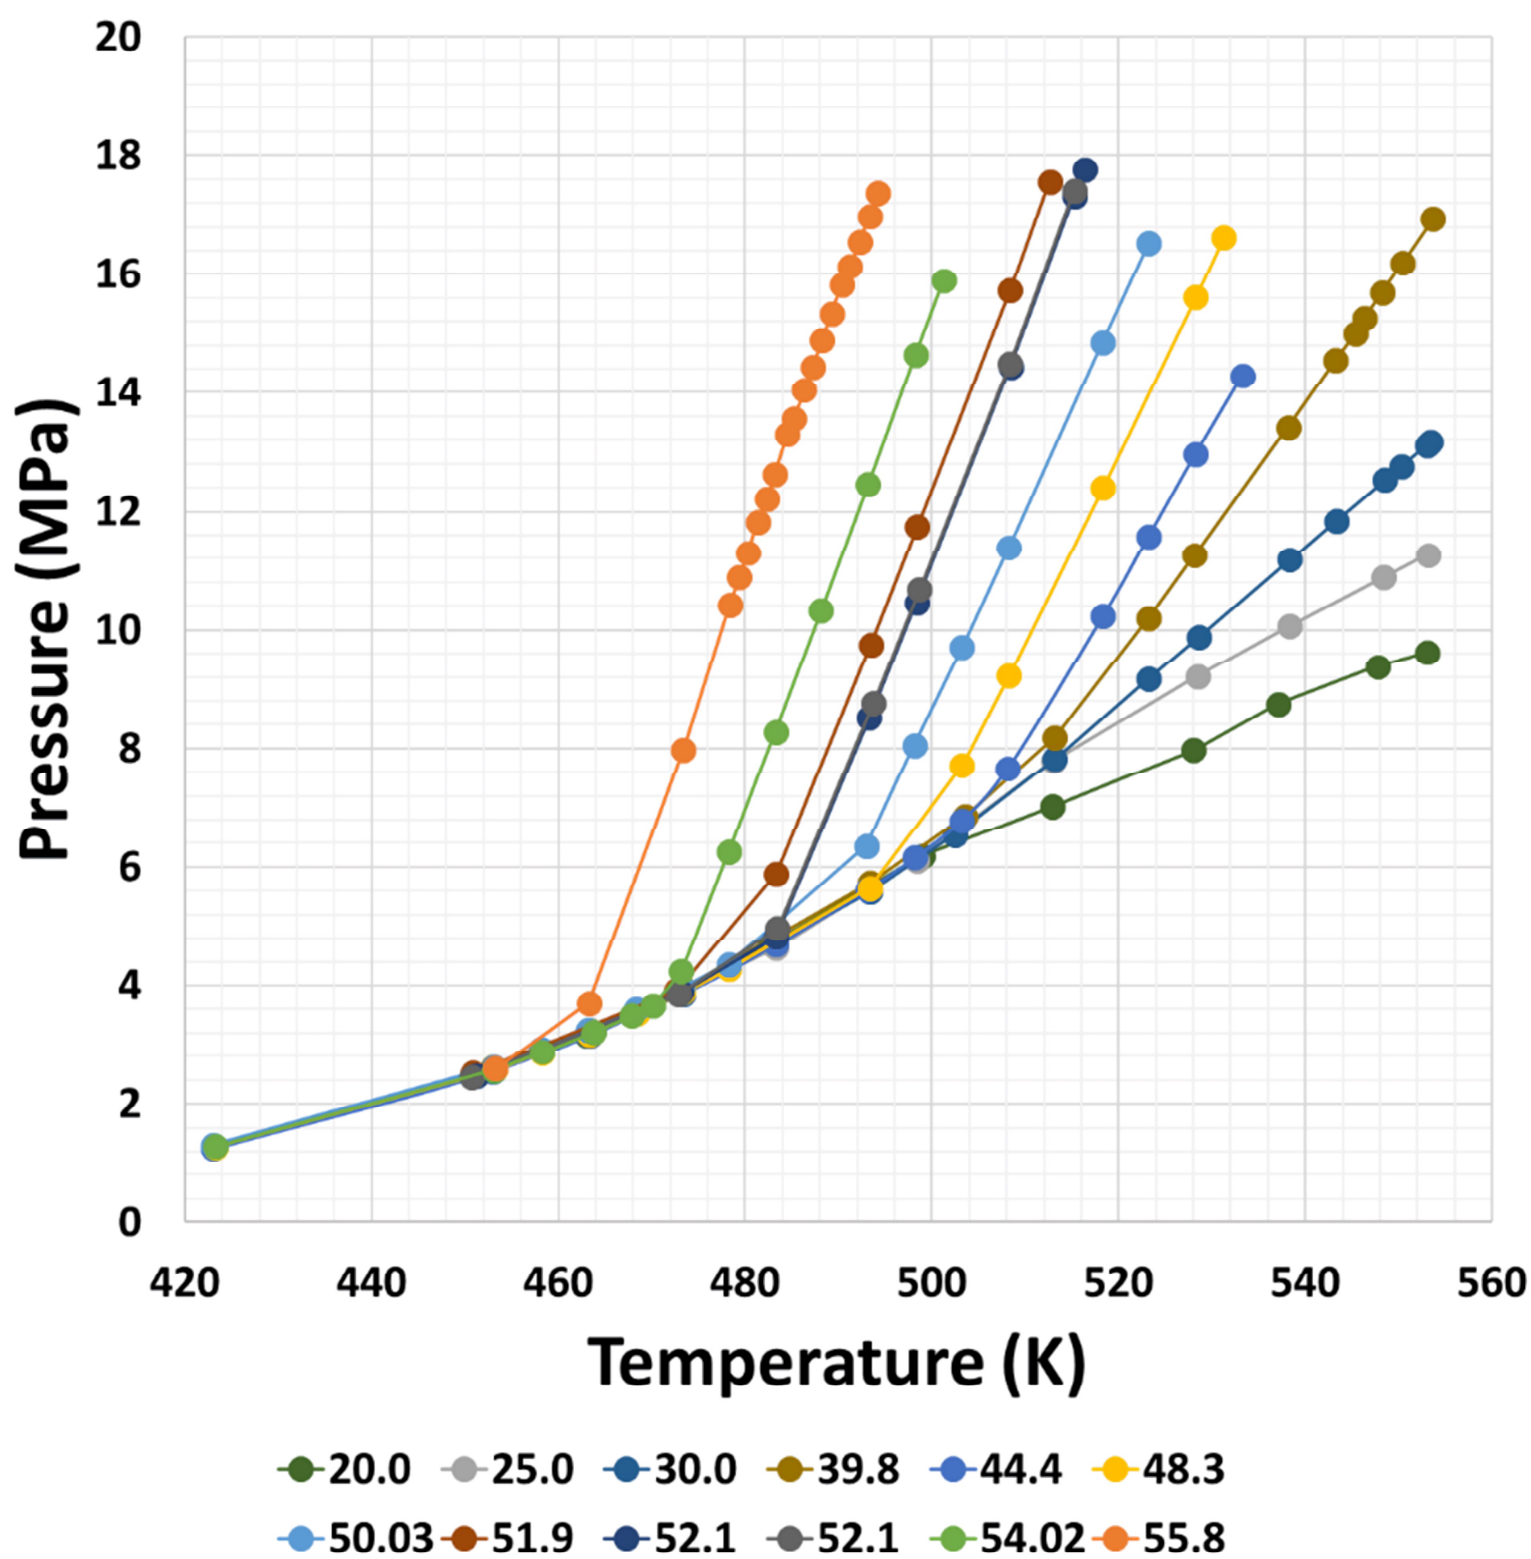

Supplement: d3gc02552g7.pdf [file d3gc02552g7.pdf]

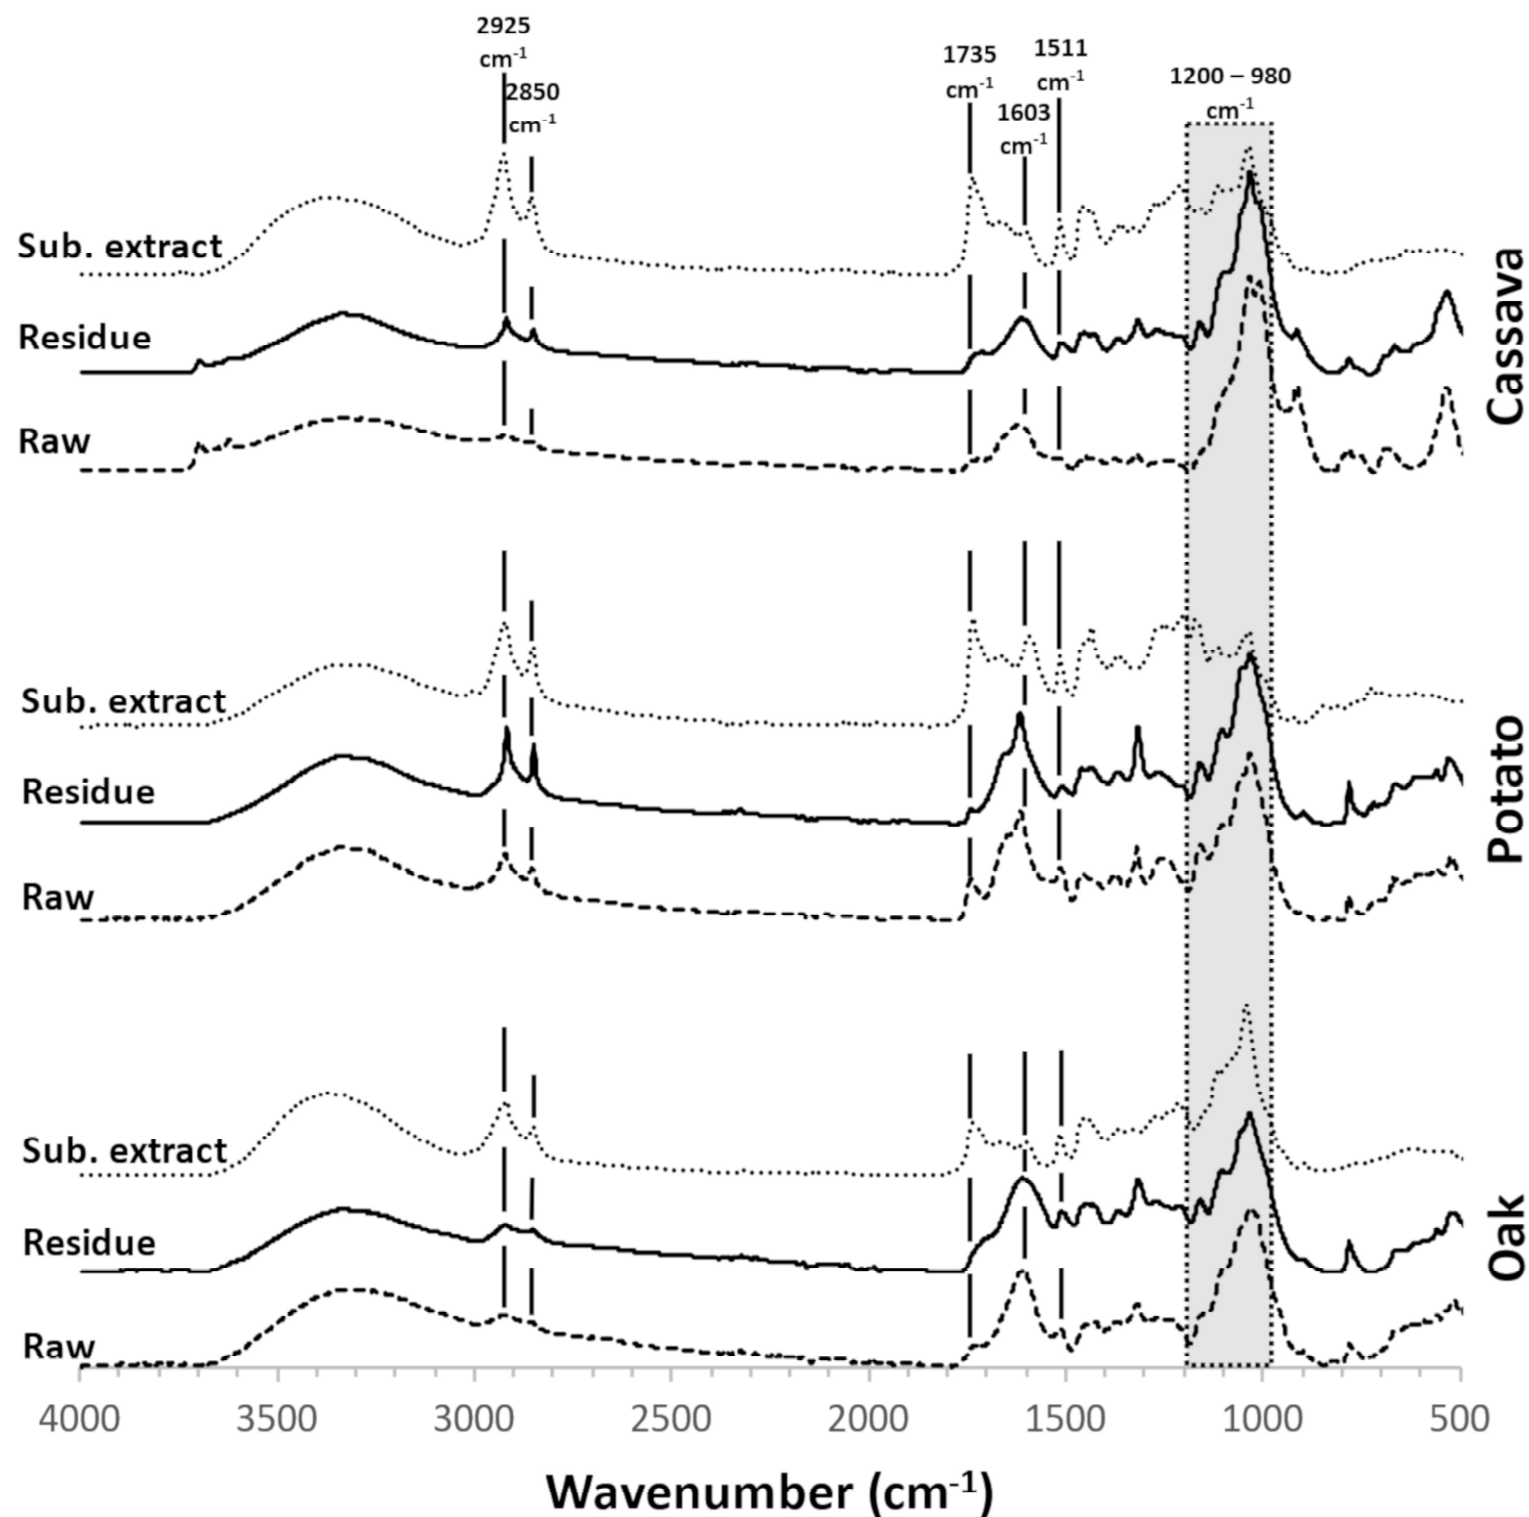

Supplement: d3gc02552g8.pdf [file d3gc02552g8.pdf]

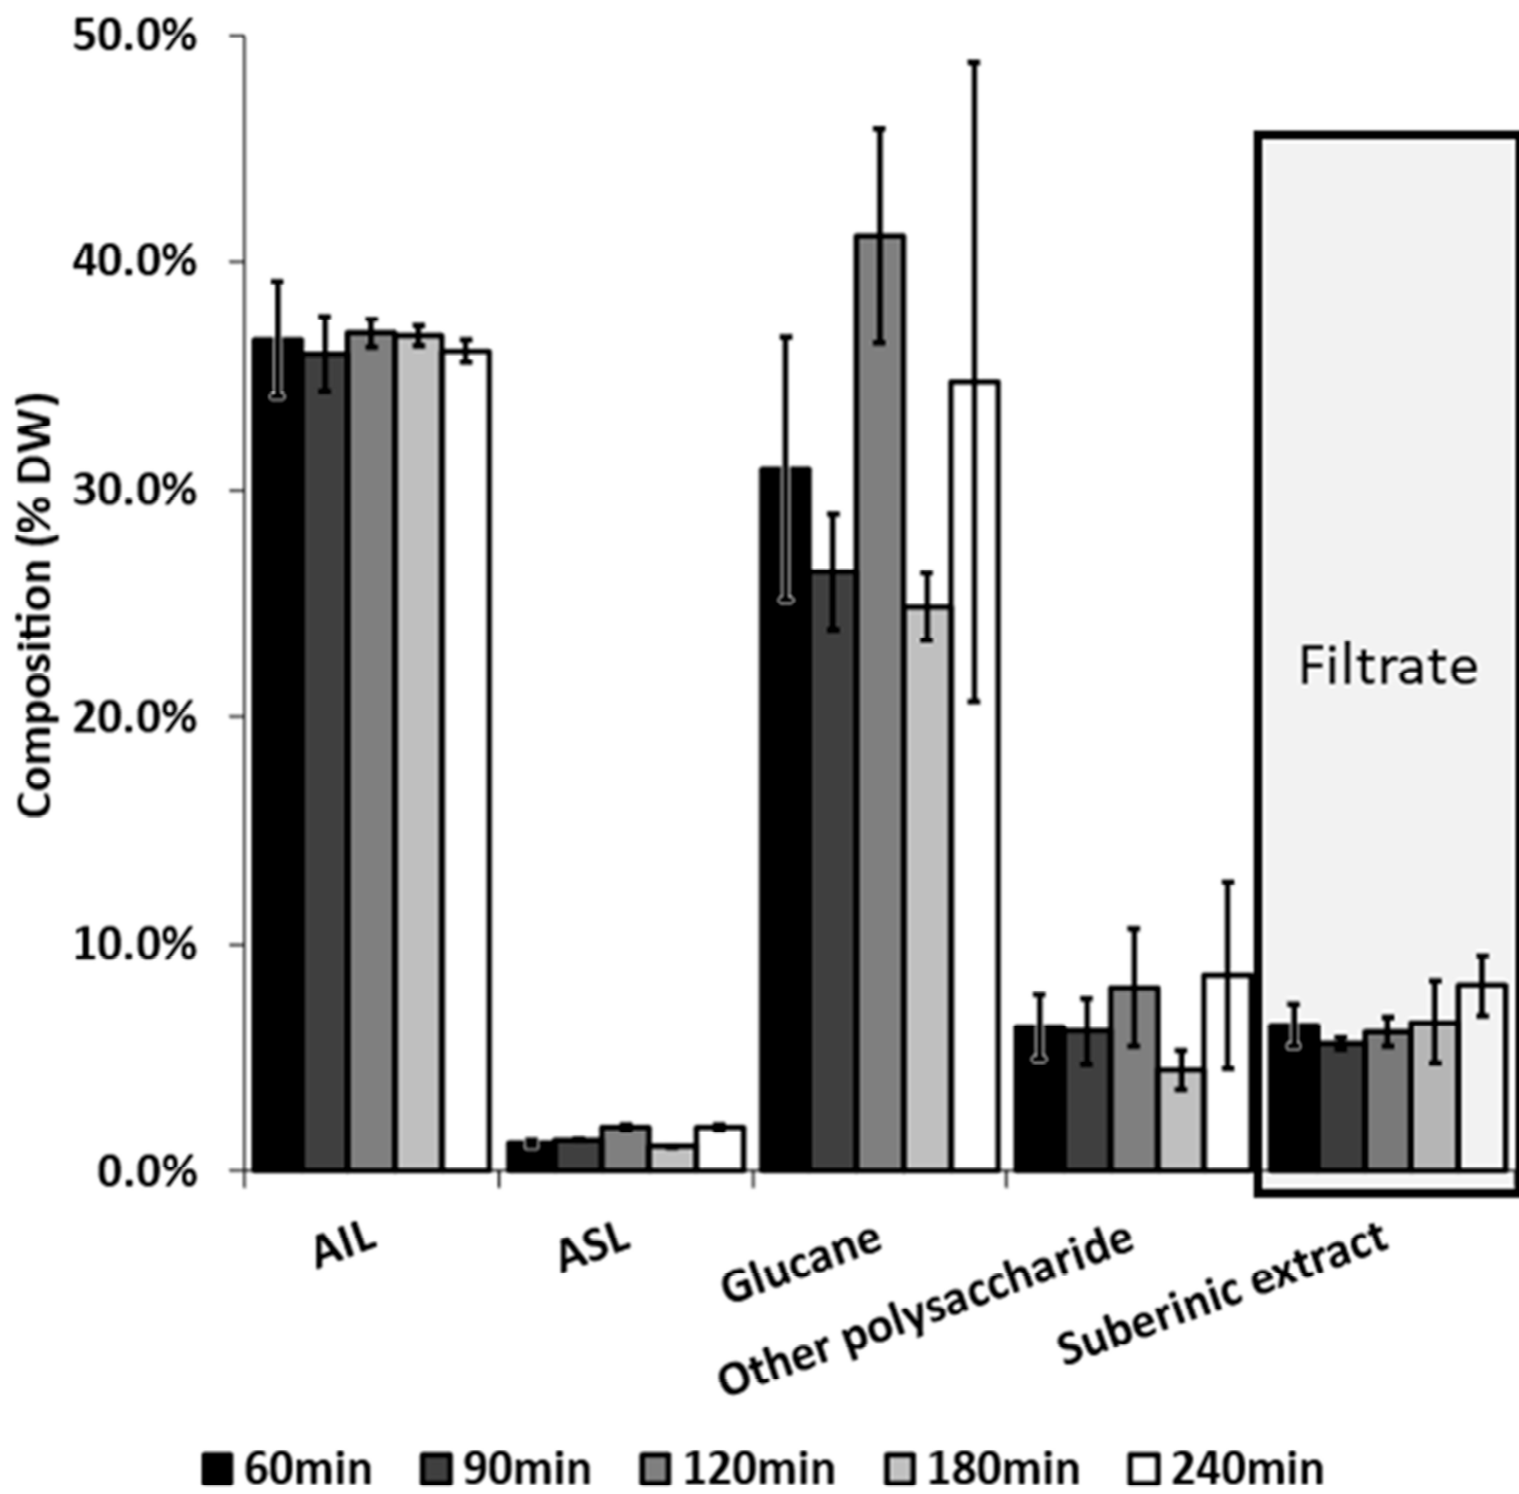

Supplement: d3gc02552g9.pdf [file d3gc02552g9.pdf]
